# Supplementary material for: Vaccine-generated lung tissue–resident memory T cells provide heterosubtypic protection to influenza infection
Source: JCI journal article supplement (doi:10.1172/jci.insight.85832), 2016-07-06
Supplement: sd1 [file 1]

## SUPPLEMENTARY FIGURES

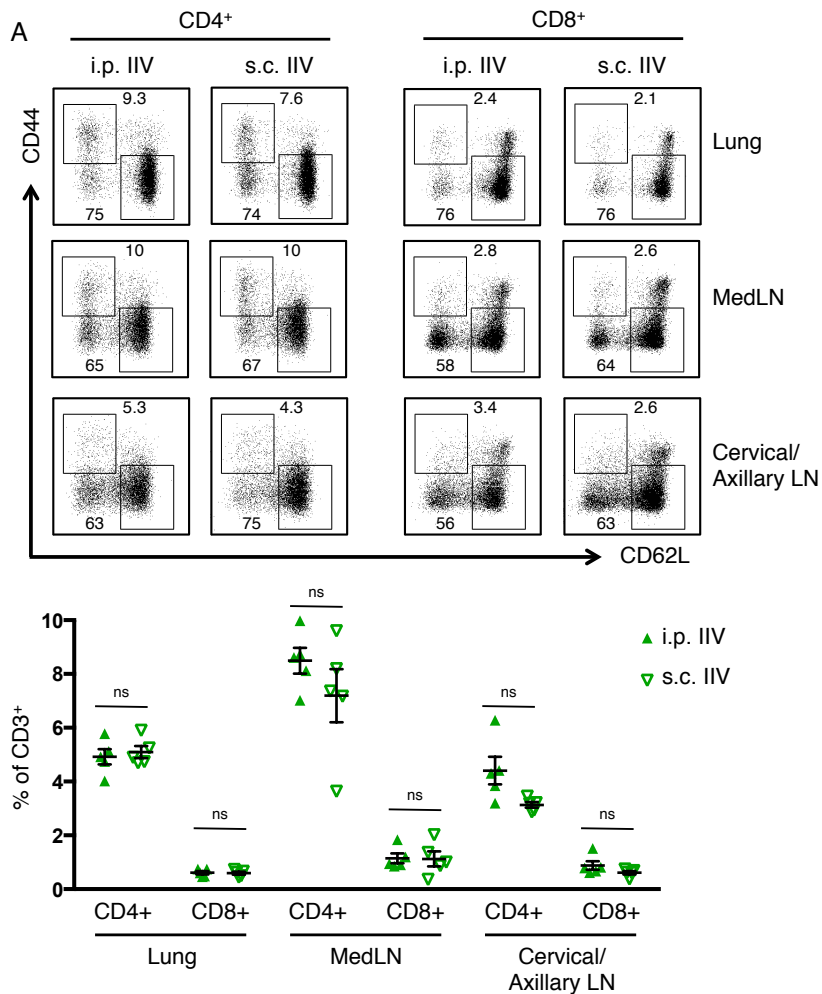

**Supplementary Figure 1. Similar primary T cell responses following vaccination with intraperitoneal (i.p.) or subcutaneous (s.c.) IIV.** (a) Flow cytometric analysis of CD4<sup>+</sup> and CD8<sup>+</sup> T cells 10 days post-vaccination in the lung, medLN and pooled cervical/axillary lymph nodes of mice vaccinated intraperitoneally (i.p.) or subcutaneously (s.c.) at the base of the neck with 2014-2015 IIV. Top: Representative percentages of cells with naïve (CD44<sup>lo</sup>CD62L<sup>hi</sup>) and effector/memory (CD44<sup>hi</sup>CD62L<sup>lo</sup>) phenotypes. Bottom: Individual percentages of effector/memory phenotype in each tissue  $\pm$  SEM. (n=5 mice per group; significance determined by two-way ANOVA with Holm-Sidak's multiple comparisons test, ns P>0.05).

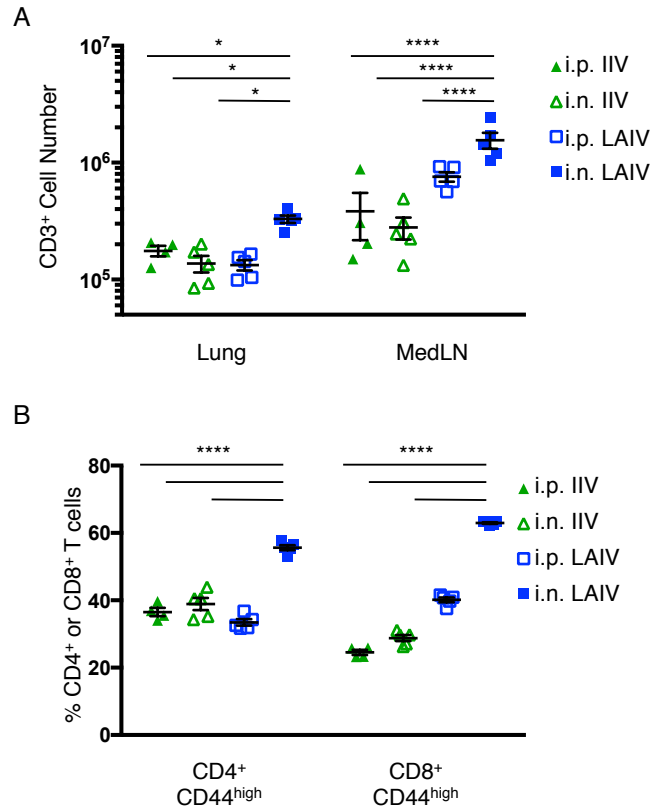

**Supplementary Figure 2. Effect of vaccine formulation and administration route on lung-localized T cell responses to vaccination. (a)** Absolute numbers of CD3<sup>+</sup> T cells in the lung and medLN 10 days post-vaccination in i.n. or i.p. 2014-2015 IIV-vaccinated and i.n. or i.p. 2014-2015 LAIV-vaccinated animals. Graph displays mean absolute cell numbers  $\pm$  SEM. (n=4-5 mice per group; significance determined by two-way ANOVA with Holm-Sidak's multiple comparisons test, \*\*\*\* P<0.0001, \* P<0.05). **(b)** Percentage of CD44<sup>+</sup> CD4<sup>+</sup> and CD8<sup>+</sup> T cells in the lung 10 days post-vaccination with 2014-2015 IIV given i.n. or i.p or 2014-2015 LAIV given i.n. or i.p. Graph displays individual percentages of CD44<sup>hi</sup> CD4<sup>+</sup> and CD8<sup>+</sup> T cells  $\pm$  SEM. (n=4-5 mice per group; significance determined by two-way ANOVA with Holm-Sidak's multiple comparisons test, \*\*\*\* P<0.0001).

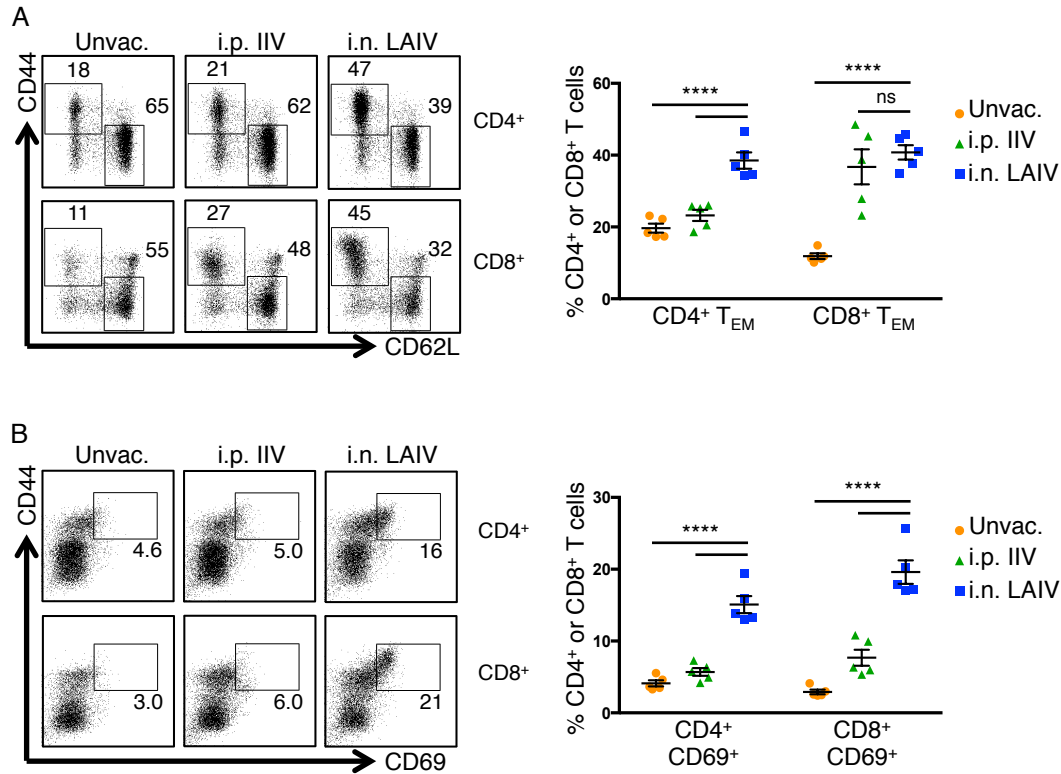

**Supplementary Figure 3. Primary lung T cell responses following vaccination with 2015-2016 IIV or LAIV.** (a) Flow cytometric analysis of lung CD4<sup>+</sup> and CD8<sup>+</sup> T cells 10 days post-vaccination with 2015-2016 IIV or 2015-2016 LAIV compared to unvaccinated mice. Left: Representative flow plots with percentages of cells with naïve (CD44<sup>lo</sup>CD62L<sup>hi</sup>) and effector/memory (CD44<sup>hi</sup>CD62L<sup>lo</sup>) phenotypes. Right: Individual percentages of lung CD4<sup>+</sup> and CD8<sup>+</sup> effector/memory phenotype T cells ± SEM. (n=5 mice per group, representative of 3 experiments; significance determined by two-way ANOVA with Holm-Sidak's multiple comparisons test, \*\*\*\* P<0.0001, ns P>0.05). (b) Frequencies of lung CD4<sup>+</sup> and CD8<sup>+</sup> T cells expressing CD69 10 days post-vaccination with 2015-2016 IIV or 2015-2016 LAIV compared to unvaccinated mice. Left: Representative flow plots with percentages of CD44<sup>hi</sup>CD69<sup>hi</sup> cells. Right: Individual percentages of lung CD4<sup>+</sup> and CD8<sup>+</sup> CD44<sup>hi</sup>CD69<sup>hi</sup> cells T cells ± SEM. (n=5 mice per group, representative of 3 experiments; significance determined by two-way ANOVA with Holm-Sidak's multiple comparisons test, \*\*\*\* P<0.0001, \* P<0.05, ns P>0.05).

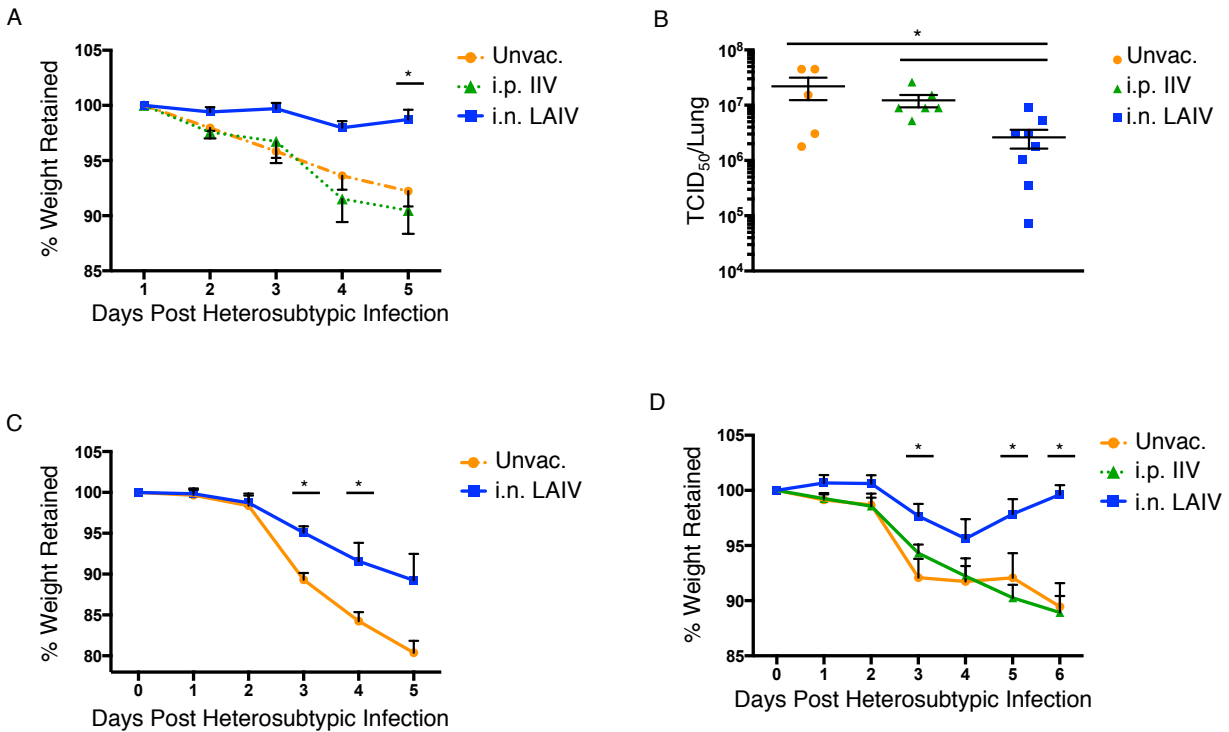

**Supplementary Figure 4. LAIV-formulations establish long-term TRM-mediated protection against multiple viral strains.** (a) Percentage weight retention following heterosubtypic PR8 (H1N1) influenza infection 12 weeks post-vaccination with 2014-2015 IIV or 2014-2015 LAIV or post-infection with X31 (H3N2) influenza, compared to unvaccinated, in animals receiving daily FTY720 treatment. Mean percentage weight retained shown  $\pm$  SEM. (n=4-5 mice per group; significance determined by multiple Student's t tests comparing i.n. LAIV-vaccinated to i.p. IIV-vaccinated groups, \* P<0.05). (b) Viral titers 5 days post-PR8 infection in unvaccinated animals or animals vaccinated with 2014-2015 IIV or 2014-2015 LAIV or infected with X31 influenza 12 weeks prior. Animals received daily FTY720 treatment throughout infection. Graph show individual titers  $\pm$  SEM. (n=4-6 mice per group; significance determined by one-way ANOVA with Holm-Sidak's multiple comparisons test, \* P<0.05, ns P>0.05). (c) Percentage weight retention following PR8 infection in unvaccinated animals or animals receiving 2014-2015 LAIV 45 weeks prior. Animals received daily FTY720 treatment throughout infection. Mean percentage weight retained shown  $\pm$  SEM. (n=4-5 mice per group, significance determined by multiple Student's t tests comparing i.n. LAIV-vaccinated and unvaccinated groups, \* P<0.05). (d) Percentage weight retention following X31 infection 6 weeks post-vaccination with 2015-2016 IIV or 2015-2016 LAIV, compared to unvaccinated, in animals receiving daily FTY720 treatment. Mean percentage weight retained shown  $\pm$  SEM. (n=5-12 mice per group; significance determined by multiple Student's t tests comparing i.n. LAIV-vaccinated to i.p. IIV-vaccinated groups, \* P<0.05).
